# Supplementary material for: PIWIL3/OIP5-AS1/miR-367-3p/CEBPA feedback loop regulates the biological behavior of glioma cells
Source: PubMed Central journal article supplement — Theranostics. 2018 Jan 1;8(4):1084–105. doi: 10.7150/thno.21740 (PMC5817112; doi:10.7150/thno.21740), 2018-01-01
Supplement: thnov08p1084s1.pdf [file thnov08p1084s1.pdf]

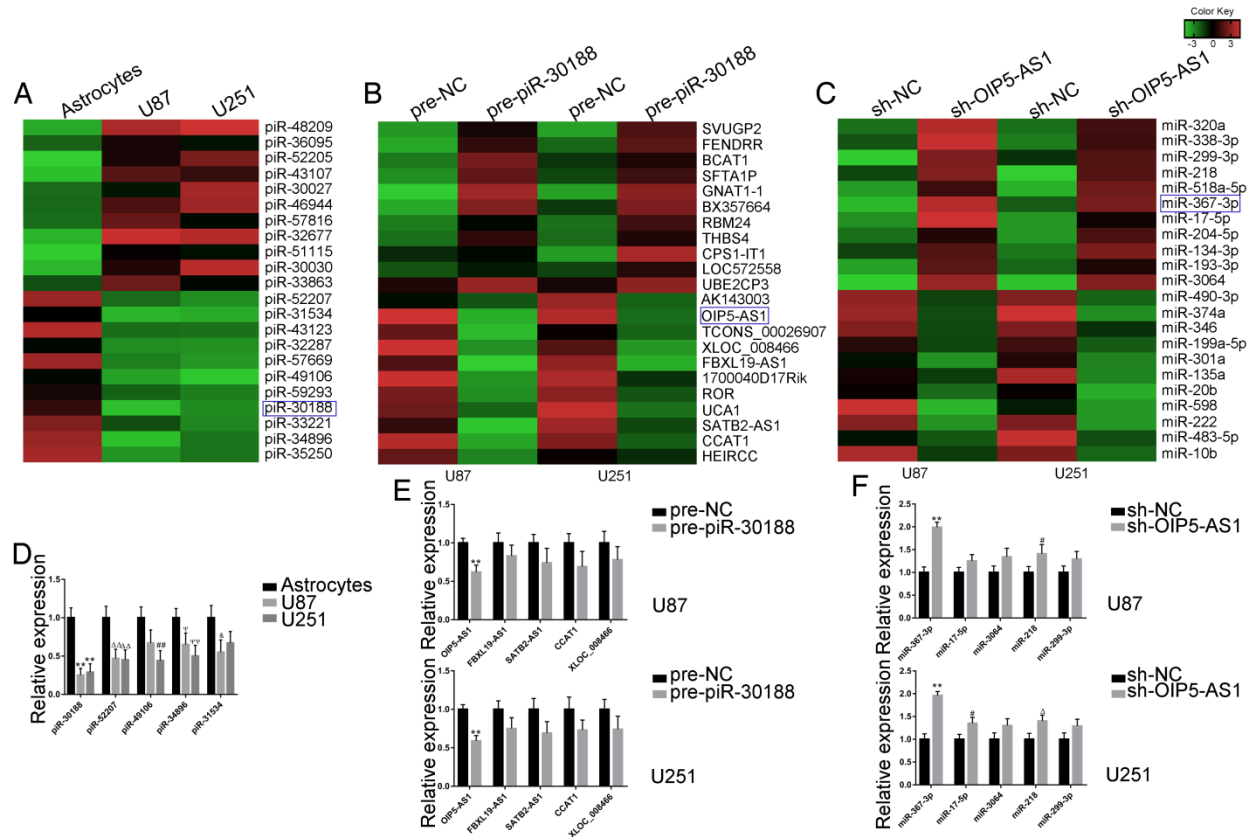

**Supplementary Figure 1.** piRNA, lncRNA and miRNA microarrays data in astrocytes, U87, and U251 cells. (A) PiRNA gene expression profiles as obtained from samples in three groups as indicated. Note: The piRNA ID is in Pubmed. (B) lncRNA gene expression profiles as obtained from samples in three groups as indicated. (C) miRNA gene expression profiles as obtained from samples in three groups as indicated. (D, E and F) qRT-PCR was performed to validate the selected molecules.

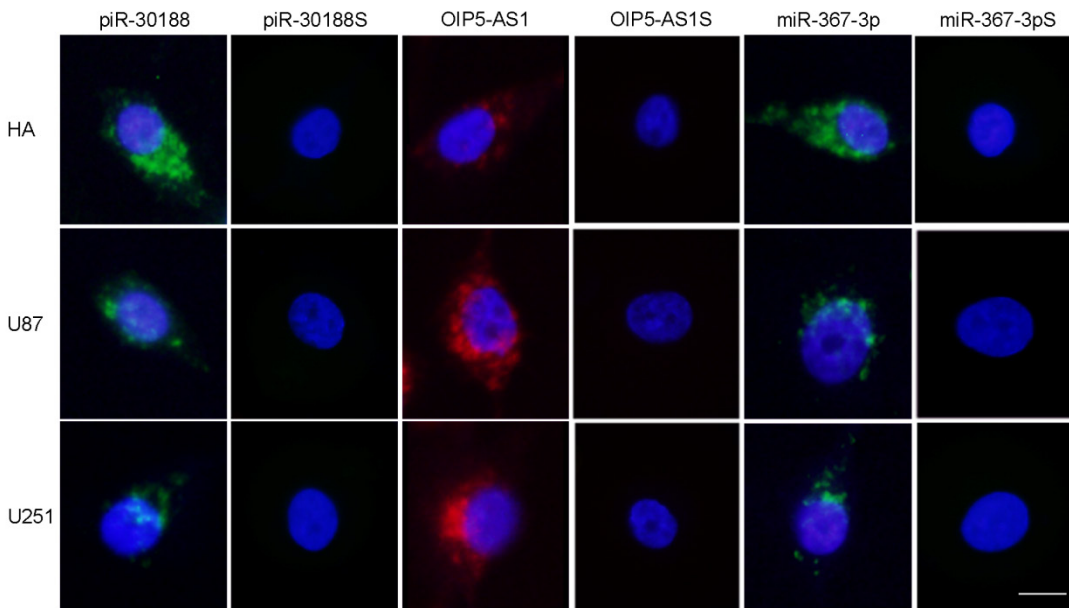

**Supplementary Figure 2.** Location and expression of piR-30188, OIP5-AS1, and miR-367-3p in normal human astrocytes (NHA), U87 and U251 cells. Left: FISH was used to determine expression and location of piR-30188 in NHA, U87 and U251 cells (green, piR-30188; blue, DAPI nuclear staining). Middle: FISH was used to determine expression and location of OIP5-AS1 in NHA, U87 and U251 cells (red, OIP5-AS1; blue, DAPI nuclear staining). Right: FISH was used to determine expression and location of miR-367-3p in NHA, U87 and U251 cells (green, miR-367-3p; blue, DAPI nuclear staining). Scale bars represent 20  $\mu\text{m}$ . PiR-30188S, OIP5-AS1S, and miR-367-3pS represented negative controls (sense sequence probe).

**Supplementary Table 1:** Detailed information about the glioma patients.

| Clinicalpathological parameters and molecular subtype |    |               |     |               |      |
|-------------------------------------------------------|----|---------------|-----|---------------|------|
| Age (years)                                           |    | Number        |     |               |      |
| ≤45                                                   |    | 16            |     |               |      |
| >45                                                   |    | 21            |     |               |      |
| Gender                                                |    |               |     |               |      |
| Male                                                  |    | 23            |     |               |      |
| Female                                                |    | 14            |     |               |      |
| WHO grade                                             |    | IDH1/2 status |     | LOH on 1p/19q |      |
|                                                       |    | Wt            | Mut | Complete      | Lack |
| I grade                                               | 3  | 0             | 3   | 2             | 1    |
| II grade                                              | 5  | 1             | 4   | 4             | 1    |
| III grade                                             | 12 | 5             | 7   | 7             | 5    |
| IV grade                                              | 17 | 14            | 3   | 5             | 12   |

**Supplementary Table 2 and Table 3:** Primers used in ChIP assays.
